# Supplementary material
Source: ML conference proceedings conference paper supplement (https://proceedings.neurips.cc/paper_files/paper/2021/hash/a576eafbce762079f7d1f77fca1c5cc2-Abstract.html)
Supplement: Supplementary file [file a576eafbce762079f7d1f77fca1c5cc2-Supplemental.pdf]

## A Convergence on Two-Layer Nonlinear Networks

We consider the family of neural networks

$$f(x) = \frac{1}{\sqrt{p}} \sum_{r=1}^p \beta_r \psi(w_r^\top x) = \frac{1}{\sqrt{p}} \beta^\top \psi(Wx) \quad (\text{A.1})$$

where  $\beta \in \mathbb{R}^p$ ,  $W = (w_1, \dots, w_p)^\top \in \mathbb{R}^{p \times d}$ , and  $\psi$  is an activation function. Given data, the loss function is

$$\mathcal{L}(W, \beta) = \frac{1}{2} \sum_{i=1}^n (f(x_i) - y_i)^2 = \frac{1}{2} \sum_{i=1}^n \left( \frac{1}{\sqrt{p}} \beta^\top \psi(Wx_i) - y \right)^2. \quad (\text{A.2})$$

The feedback alignment algorithm has updates

$$\begin{aligned} W(t+1) &= W(t) - \eta \frac{1}{\sqrt{p}} \sum_{i=1}^n D_i(t) b x_i^\top e_i(t) \\ \beta(t+1) &= \beta(t) - \eta \frac{1}{\sqrt{p}} \sum_{i=1}^n \psi(W(t)x_i) e_i(t) \end{aligned} \quad (\text{A.3})$$

where  $D_i(t) = \text{diag}(\psi'(W(t)x_i))$  and  $e_i(t) = \frac{1}{\sqrt{p}} \beta(t)^\top \psi(W(t)x_i) - y_i$ . To help make the proof more readable, we use  $c, C$  to denote the global constants whose values may vary from line to line.

### A.1 Concentration Results

**Lemma A.1** (Lemma A.7 in Gao & Lafferty, 2020). *Assume  $x_1, \dots, x_n \stackrel{i.i.d.}{\sim} \mathcal{N}(0, I_d/d)$ . We define matrix  $\tilde{G} \in \mathbb{R}^{n \times n}$  with entries*

$$\tilde{G}_{i,j} = |\mathbb{E} \psi'(Z)|^2 \frac{x_i^\top x_j}{\|x_i\| \|x_j\|} + (\mathbb{E} |\psi(Z)|^2 - |\mathbb{E} \psi'(Z)|^2) \mathbb{I}\{i = j\}$$

where  $Z \sim \mathcal{N}(0, 1)$ . If  $d = \Omega(\log n)$ , then with high probability, we have

$$\|\bar{G} - \tilde{G}\|^2 \lesssim \frac{\log n}{d} + \frac{n^2}{d^2}.$$

*Proof of Proposition 3.3.* If  $\psi$  is sigmoid or tanh, for a standard Gaussian random variable  $Z$ , we have

$$\gamma := \frac{1}{2} (\mathbb{E} |\psi(Z)|^2 - |\mathbb{E} \psi'(Z)|^2) > 0.$$

From Lemma A.1, we know that with high probability  $\lambda_{\min}(\bar{G}) \geq \lambda_{\min}(\tilde{G}) - \|\bar{G} - \tilde{G}\| \geq 2\gamma - C(\sqrt{\frac{\log n}{d}} + \frac{n}{d}) \geq \gamma$ .  $\square$

**Lemma A.2.** *Assume  $W(0)$ ,  $\beta(0)$  and  $b$  have i.i.d. standard Gaussian entries. Given  $\delta \in (0, 1)$ , if  $p = \Omega(n/\delta)$ , then with probability  $1 - \delta$*

$$\frac{1}{p} \sum_{r=1}^p |b_r| \leq c, \quad (\text{A.4})$$

$$\frac{1}{p} \sum_{r=1}^p |b_r \beta_r(0)| \leq c, \quad (\text{A.5})$$

$$\|e(0)\| \leq c\sqrt{n}, \quad (\text{A.6})$$

$$\max_{r \in [p]} |b_r| \leq 2\sqrt{\log p}. \quad (\text{A.7})$$

*Proof.* We will show each inequality holds with probability at least  $1 - \frac{\delta}{4}$ , then by a union bound, all of them hold with probability at least  $1 - \delta$ . Since  $\mathbb{V}\text{ar}(\frac{1}{p} \sum_{r=1}^p |b_r|) \leq \frac{\mathbb{V}\text{ar}(|b_0|)}{p}$ , by Chebyshev's inequality, we have

$$\mathbb{P}(\frac{1}{p} \sum_{r=1}^p |b_r| > \mathbb{E}(b_1) + 1) \leq \frac{\mathbb{V}\text{ar}(|b_1|)}{p} \leq \delta/4$$

if  $p \geq 4\mathbb{V}\text{ar}(|b_1|)/\delta$ , which gives (A.4). The proof for (A.5) is similar since  $\mathbb{V}\text{ar}(\frac{1}{p} \sum_{r=1}^p |b_r \beta_r(0)|) = O(1/p)$ . To prove (A.6), since  $|y_i|$  and  $\|x_i\|$  are bounded, it suffices to show  $|u_i(0)| \leq c$  for all  $i \in [n]$ . Actually, by independence, we have

$$\mathbb{V}\text{ar}(u_i(0)) = \mathbb{V}\text{ar}\left(\frac{1}{p} \sum_{r=1}^p \beta_r(0) \psi(w_r(0)^\top x_i)\right) = \frac{1}{p} \mathbb{V}\text{ar}\left(\beta_1(0) \psi(w_1(0)^\top x_i)\right) = O(1/p).$$

By Chebyshev's inequality, we have for each  $i \in [n]$

$$\mathbb{P}(|u_i(0)| > c) \leq \frac{\mathbb{V}\text{ar}(u_i(0))}{c^2} \leq \frac{\delta}{4n}$$

where we require  $p = \Omega(n/\delta)$ . With a union bound argument, we can show (A.6). Finally, (A.7) followed from standard Gaussian tail bounds and union bound argument, yielding

$$\mathbb{P}(\max_{r \in [p]} |b_r| > 2\sqrt{\log p}) \leq \sum_{r \in [p]} \mathbb{P}(|b_r| > 2\sqrt{\log p}) \leq 2pe^{-2 \log p} = \frac{2}{p} \leq \frac{\delta}{4}.$$

□

**Lemma A.3.** *Under the conditions of Theorem 3.2, we define matrices  $G(0), H(0) \in \mathbb{R}^{n \times n}$  with entries*

$$G_{ij}(0) = \frac{1}{p} \psi(W(0)x_i)^\top \psi(W(0)x_j) = \frac{1}{p} \sum_{r=1}^p \psi(w_r(0)^\top x_i) \psi(w_r(0)^\top x_j) \quad (\text{A.8})$$

and

$$H_{ij}(0) = \frac{x_i^\top x_j}{p} \beta(0)^\top D_i(0) D_j(0) b = \frac{1}{p} \sum_{r=1}^p \beta_r(0) b_r \psi'(w_r(0)^\top x_i) \psi'(w_r(0)^\top x_j). \quad (\text{A.9})$$

For any  $\delta \in (0, 1)$ , if  $p = \Omega(\frac{n^2}{\delta\gamma^2})$ , then with probability at least  $1 - \delta$ , we have  $\lambda_{\min}(G(0)) \geq \frac{3}{4}\gamma$  and  $\|H(0)\| \leq \frac{\gamma}{4}$ .

*Proof.* By independence and boundedness of  $\psi$  and  $\psi'$ , we have  $\mathbb{V}\text{ar}(G_{ij}(0)) = O(1/p)$  and  $\mathbb{V}\text{ar}(H_{ij}(0)) = O(1/p)$ . Since  $\mathbb{E}(G(0)) = \bar{G}$ , we have

$$\mathbb{E}\|G(0) - \bar{G}\|^2 \leq \mathbb{E}\|G(0) - \bar{G}\|_F^2 = O(\frac{n^2}{p}).$$

By Markov's inequality, when  $p = \Omega(\frac{n^2}{\delta\gamma^2})$

$$\mathbb{P}(\|G(0) - \bar{G}\| > \frac{\gamma}{4}) \leq O(\frac{n^2}{p\gamma^2}) \leq \frac{\delta}{2}.$$

Similarly we have  $\mathbb{P}(\|H(0)\| > \frac{\gamma}{4}) \leq \frac{\delta}{2}$ , since  $\mathbb{E}(H(0)) = 0$ . Then with probability at least  $1 - \delta$ ,  $\lambda_{\min}(G(0)) \geq \lambda_{\min}(\bar{G}) - \gamma/4 \geq \frac{3}{4}\gamma$ , and  $\|H(0)\| \leq \gamma/4$ . □

## A.2 Proof of Theorem 3.2

**Lemma A.4.** *Assume all the inequalities from Lemma A.2 hold. Under the conditions of Theorem 3.2, if the error bound (3.1) holds for all  $t = 1, 2, \dots, t' - 1$ , then the bounds (3.2) hold for all  $t \leq t'$ .*

*Proof.* From the feedback alignment updates (A.3), we have for all  $t \leq T$

$$\begin{aligned}
|\beta_r(t) - \beta_r(0)| &\leq \frac{\eta}{\sqrt{p}} \sum_{s=0}^{t-1} \sum_{i=1}^n |\psi(w_r(t)x_i)e_i(t)| \\
&\leq c \frac{\eta}{\sqrt{p}} \sum_{s=0}^{t-1} \sum_{i=1}^n |e_i(t)| \\
&\leq c \frac{\eta\sqrt{n}}{\sqrt{p}} \sum_{s=0}^{t-1} \|e(t)\| \\
&\leq c \frac{\eta\sqrt{n}}{\sqrt{p}} \sum_{s=0}^{t-1} (1 - \frac{\gamma\eta}{4})^s \|e(0)\| \\
&\leq c \frac{\sqrt{n}}{\gamma\sqrt{p}} \|e(0)\| \\
&\leq c \frac{n}{\gamma\sqrt{p}}
\end{aligned}$$

where we use the fact that  $\psi$  is bounded and (A.6). We also have

$$\begin{aligned}
\|w_r(t) - w_r(0)\| &\leq \frac{\eta}{\sqrt{p}} \sum_{s=0}^{t-1} \sum_{i=1}^n \|\psi'(w_r(t)x_i)b_r x_i e_i(t)\| \\
&\leq c \frac{\eta}{\sqrt{p}} \sum_{s=0}^{t-1} \sum_{i=1}^n |b_r| |e_i(t)| \\
&\leq c |b_r| \frac{\eta\sqrt{n}}{\sqrt{p}} \sum_{s=0}^{t-1} \|e(t)\| \\
&\leq c |b_r| \frac{\sqrt{n}}{\gamma\sqrt{p}} \|e(0)\| \\
&\leq c \frac{n\sqrt{\log p}}{\gamma\sqrt{p}}
\end{aligned}$$

where we use that  $\psi'$  is bounded, (A.6) and (A.7).  $\square$

**Lemma A.5.** *Assume all the inequalities from Lemma A.2 hold. Under the conditions of Theorem 3.2, if the bound for the weights difference (3.2) holds for all  $t \leq t'$  and error bound (3.1) holds for all  $t \leq t' - 1$ , then (3.1) holds for  $t = t'$ .*

*Proof.* We start with analyzing the error  $e(t)$  according to

$$\begin{aligned}
e_i(t+1) &= \frac{1}{\sqrt{p}} \beta(t+1)^\top \psi(W(t+1)x_i) - y_i \\
&= \frac{1}{\sqrt{p}} \beta(t+1)^\top (\psi(W(t+1)x_i) - \psi(W(t)x_i)) + \frac{1}{\sqrt{p}} (\beta(t+1) - \beta(t))^\top \psi(W(t)x_i) \\
&\quad + \frac{1}{\sqrt{p}} \beta(t)^\top \psi(W(t)x_i) - y_i \\
&= e_i(t) - \frac{\eta}{p} \beta(t+1)^\top D_i(t) \sum_{j=1}^n D_j(t) b x_j^\top x_i e_j(t) - \frac{\eta}{p} \sum_{j=1}^n \psi(W(t)x_j)^\top \psi(W(t)x_i) e_j(t) \\
&\quad + v_i(t) \\
&= e_i(t) - \eta \sum_{j=1}^n (H_{ij}(t) + G_{ij}(t)) e_j(t) + v_i(t)
\end{aligned}$$

where

$$G_{ij}(t) = \frac{1}{p} \psi(W(t)x_j)^\top \psi(W(t)x_i)$$

$$H_{ij}(t) = \frac{x_i^\top x_j}{p} \beta(t+1)^\top D_i(t) D_j(t) b$$

and  $v_i(t)$  is the residual term from the Taylor expansion

$$v_i(t) = \frac{1}{2\sqrt{p}} \sum_{r=1}^p \beta_r(t+1) |(w_r(t+1) - w_r(t))^\top x_i|^2 \psi''(\xi_{ri}(t))$$

with  $\xi_{ri}(t)$  between  $w_r(t)^\top x_i$  and  $w_r(t+1)^\top x_i$ . We can also rewrite the above iteration in vector form as

$$e(t+1) = e(t) - \eta(G(t) + H(t))e(t) + v(t). \quad (\text{A.10})$$

Now for  $t = t' - 1$ , we wish to show that both  $G(t)$  and  $H(t)$  are close to their initialization. Notice that

$$\begin{aligned} |G_{ij}(t) - G_{ij}(0)| &= \frac{1}{p} \left| \psi(W(t)x_j)^\top \psi(W(t)x_i) - \psi(W(0)x_j)^\top \psi(W(0)x_i) \right| \\ &\leq \frac{1}{p} \sum_{r=1}^p |\psi(w_r(t)^\top x_j)| |\psi(w_r(t)^\top x_i) - \psi(w_r(0)^\top x_i)| \\ &\quad + \frac{1}{p} \sum_{r=1}^p |\psi(w_r(0)^\top x_i)| |\psi(w_r(t)^\top x_j) - \psi(w_r(0)^\top x_j)| \\ &\leq c \frac{1}{p} \sum_{r=1}^p |w_r(t)^\top x_i - w_r(0)^\top x_i| + \frac{1}{p} \sum_{r=1}^p |w_r(t)^\top x_j - w_r(0)^\top x_j| \\ &\leq c_0 \frac{n\sqrt{\log p}}{\gamma\sqrt{p}} (\|x_i\| + \|x_j\|) \end{aligned}$$

where the second inequality is due to the boundedness of  $\psi$  and  $\psi'$ , and the last inequality is by (3.2). Then we have

$$\|G(t) - G(0)\| \leq \max_{j \in [n]} \sum_{i=1}^n |G_{ij}(t) - G_{ij}(0)| \leq c_0 \frac{n^2 \sqrt{\log p}}{\gamma\sqrt{p}}. \quad (\text{A.11})$$

For matrix  $H(t)$ , we similarly have

$$\begin{aligned} |H_{ij}(t) - H_{ij}(0)| &\leq \frac{|x_i^\top x_j|}{p} \left| \beta(t+1)^\top D_i(t) D_j(t) b - \beta(0)^\top D_i(0) D_j(0) b \right| \\ &\leq \frac{\|x_i\| \|x_j\|}{p} \sum_{r=1}^p \left| b_r \beta_r(t+1) \psi'(w_r(t)^\top x_i) \psi'(w_r(t)^\top x_j) \right. \\ &\quad \left. - b_r \beta_r(0) \psi'(w_r(0)^\top x_i) \psi'(w_r(0)^\top x_j) \right| \\ &\leq \frac{\|x_i\| \|x_j\|}{p} \sum_{r=1}^p \left( |b_r| |\beta_r(t+1) - \beta_r(0)| |\psi'(w_r(t)^\top x_i) \psi'(w_r(t)^\top x_j)| \right. \\ &\quad \left. + |b_r| |\beta_r(0)| |\psi'(w_r(t)^\top x_i) - \psi'(w_r(0)^\top x_i)| |\psi'(w_r(t)^\top x_j)| \right. \\ &\quad \left. + |b_r| |\beta_r(0)| |\psi'(w_r(0)^\top x_i)| |\psi'(w_r(t)^\top x_j) - \psi'(w_r(0)^\top x_j)| \right) \\ &\leq c \frac{\|x_i\| \|x_j\|}{p} \sum_{r=1}^p \left( |b_r| \frac{n}{\gamma\sqrt{p}} + |b_r| |\beta_r(0)| \frac{n\sqrt{\log p}}{\gamma\sqrt{p}} (\|x_i\| + \|x_j\|) \right) \\ &\leq c_1 \frac{n}{\gamma\sqrt{p}} + c_2 \frac{n\sqrt{\log p}}{\gamma\sqrt{p}}. \end{aligned}$$

It follows that

$$\|H(t) - H(0)\| \leq \max_{j \in [n]} \sum_{i=1}^n |H_{ij}(t) - H_{ij}(0)| \leq c_1 \frac{n^2}{\gamma\sqrt{p}} + c_2 \frac{n^2\sqrt{\log p}}{\gamma\sqrt{p}}. \quad (\text{A.12})$$

Next, we bound the residual term  $v_i(t)$ . Since  $\psi''$  is bounded, we have

$$\begin{aligned} |v_i(t)| &\leq c \frac{1}{\sqrt{p}} \sum_{r=1}^p |\beta_r(t+1)| \|w_r(t+1) - w_r(t)\|^2 \\ &\leq c \frac{1}{\sqrt{p}} \frac{\eta^2}{p} \sum_{r=1}^p |\beta_r(t+1)| \left( \sum_{i=1}^n \|\psi'(w_r(t)^\top x_i) b_r x_i e_i(t)\| \right)^2 \\ &\leq c \frac{1}{\sqrt{p}} \frac{\eta^2}{p} \sum_{r=1}^p |\beta_r(t+1)| |b_r|^2 \left( \sum_{i=1}^n |e_i(t)| \right)^2 \\ &\leq c \frac{\eta^2 n}{\sqrt{p}} \|e(t)\|^2 \\ &\leq c_3 \frac{\eta^2 n \sqrt{n}}{\sqrt{p}} \|e(t)\|. \end{aligned}$$

This leads to the bound

$$\|v(t)\| = \left( \sum_{i=1}^n |v_i(t)|^2 \right)^{1/2} \leq c_3 \frac{\eta^2 n^2}{\sqrt{p}} \|e(t)\|. \quad (\text{A.13})$$

Combining Eqs. (A.10) to (A.13), we have

$$\begin{aligned} \|e(t+1)\| &\leq \|I_n - \eta(G(t) + H(t))\| \|e(t)\| + \|v(t)\| \\ &\leq \left( \|I_n - \eta G(0)\| + \eta \|G(t) - G(0)\| + \eta \|H(0)\| \right. \\ &\quad \left. + \eta \|H(t) - H(0)\| \right) \|e(t)\| + \|v(t)\| \\ &\leq \left( 1 - \frac{3\eta\gamma}{4} + c_0 \frac{\eta n^2 \sqrt{\log p}}{\gamma\sqrt{p}} + \frac{\eta\gamma}{4} + c_1 \frac{\eta n^2}{\gamma\sqrt{p}} + c_2 \frac{\eta n^2 \sqrt{\log p}}{\gamma\sqrt{p}} + c_3 \frac{\eta^2 n \sqrt{n}}{\sqrt{p}} \right) \|e(t)\| \\ &\leq \left( 1 - \frac{\eta\gamma}{4} \right) \|e(t)\| \end{aligned}$$

where we use Lemma A.3 and  $p = \Omega(\frac{n^4 \log p}{\gamma^4})$ .  $\square$

*Proof of Theorem 3.2.* We prove the inequality (3.1) by induction. Suppose (3.1) and (3.2) hold for all  $t = 1, 2, \dots, t' - 1$ , by Lemma A.4 and Lemma A.5 we know (3.1) and (3.2) hold for  $t = t'$ , which completes the proof.  $\square$

### A.3 Proof of Theorem 4.2

**Lemma A.6.** *Assume all the inequalities from Lemma A.2 hold. Under the conditions of Theorem 4.2, if the error bound (4.2) holds for all  $t = 1, 2, \dots, t' - 1$ , then*

$$\begin{aligned} \|w_r(t) - w_r(0)\| &\leq c_1 \frac{n\sqrt{\log p}}{\gamma\sqrt{p}} (1 + \eta\tilde{S}_\lambda), \\ |\beta_r(t) - \beta_r(0)| &\leq c_2 \frac{n}{\gamma\sqrt{p}} (1 + \eta\tilde{S}_\lambda) \end{aligned} \quad (\text{A.14})$$

hold for all  $t \leq t'$ , where  $c_1, c_2$  are constants.

*Proof.* For any  $k \leq t' - 1$ , we apply (4.2) repeatedly on the right hand side of itself to get

$$\|e(k)\| \leq \prod_{i=0}^{k-1} \left( 1 - \frac{\eta\gamma}{4} - \eta\lambda(i) \right) \|e(0)\| + \sum_{i=0}^{k-1} \eta\lambda(i) \prod_{i < j < k} \left( 1 - \frac{\eta\gamma}{4} - \eta\lambda(j) \right) \|y\|.$$

For  $t \leq t' - 1$ , we take the sum over  $k = 0, \dots, t$  on both sides of above inequality to obtain

$$\begin{aligned}
\sum_{k=0}^t \|e(k)\| &\leq \sum_{k=0}^t \prod_{i=0}^{k-1} \left(1 - \frac{\eta\gamma}{4} - \eta\lambda(i)\right) \|e(0)\| + \sum_{k=0}^t \sum_{i=0}^{k-1} \eta\lambda(i) \prod_{i < j < k} \left(1 - \frac{\eta\gamma}{4} - \eta\lambda(j)\right) \|y\| \\
&\leq \sum_{k=0}^t \left(1 - \frac{\eta\gamma}{4}\right)^{k-1} \|e(0)\| + \sum_{k=0}^t \sum_{i=0}^{k-1} \eta\lambda(i) \left(1 - \frac{\eta\gamma}{4}\right)^{k-i-1} \|y\| \\
&\leq \sum_{k=0}^t \left(1 - \frac{\eta\gamma}{4}\right)^{k-1} \|e(0)\| + \eta \|y\| \sum_{k=0}^{t-1} \lambda(i) \sum_{k=i+1}^T \left(1 - \frac{\eta\gamma}{4}\right)^{k-i-1} \\
&\leq \frac{4}{\eta\gamma} \|e(0)\| + \frac{4}{\gamma} \tilde{S}_\lambda \|y\| \\
&\leq \frac{c\sqrt{n}}{\gamma} \left(\frac{1}{\eta} + \tilde{S}_\lambda\right)
\end{aligned}$$

where we use  $\|e(0)\| = O(\sqrt{n})$  and  $\|y\| = O(\sqrt{n})$ . Then for all  $t \leq t'$ , we have

$$\begin{aligned}
|\beta_r(t) - \beta_r(0)| &\leq \frac{\eta}{\sqrt{p}} \sum_{s=0}^{t-1} \sum_{i=1}^n |\psi(w_r(t)x_i)e_i(t)| \\
&\leq c \frac{\eta}{\sqrt{p}} \sum_{s=0}^{t-1} \sum_{i=1}^n |e_i(t)| \\
&\leq c \frac{\eta\sqrt{n}}{\sqrt{p}} \sum_{s=0}^{t-1} \|e(t)\| \\
&\leq c \frac{\eta\sqrt{n}}{\sqrt{p}} \frac{\sqrt{n}}{\gamma} \left(\frac{1}{\eta} + \tilde{S}_\lambda\right) \\
&\leq c \frac{n}{\gamma\sqrt{p}} (1 + \eta\tilde{S}_\lambda)
\end{aligned}$$

where we use  $\psi$  is bounded and (A.6). We also have

$$\begin{aligned}
\|w_r(t) - w_r(0)\| &\leq \frac{\eta}{\sqrt{p}} \sum_{s=0}^{t-1} \sum_{i=1}^n \|\psi'(w_r(t)^\top x_i) b_r x_i e_i(t)\| \\
&\leq c \frac{\eta}{\sqrt{p}} \sum_{s=0}^{t-1} \sum_{i=1}^n |b_r| |e_i(t)| \\
&\leq c |b_r| \frac{\eta\sqrt{n}}{\sqrt{p}} \sum_{s=0}^{t-1} \|e(t)\| \\
&\leq c |b_r| \frac{\eta\sqrt{n}}{\sqrt{p}} \frac{\sqrt{n}}{\gamma} \left(\frac{1}{\eta} + \tilde{S}_\lambda\right) \\
&\leq c \frac{n\sqrt{\log p}}{\gamma\sqrt{p}} (1 + \eta\tilde{S}_\lambda)
\end{aligned}$$

where we use the fact that  $\psi'$  is bounded, (A.6) and (A.7). □

**Lemma A.7.** *Assume all the inequalities from Lemma A.2 hold. Under the conditions of Theorem 4.2, if the bound for weights difference (A.14) holds for all  $t \leq t'$  and error bound (4.2) holds for all  $t \leq t' - 1$ , then (4.2) holds for  $t = t'$ .*

*Proof.* We start by analyzing the error  $e(t)$  according to

$$\begin{aligned}
e_i(t+1) &= \frac{1}{\sqrt{p}}\beta(t+1)^\top \psi(W(t+1)x_i) - y_i \\
&= \frac{1}{\sqrt{p}}\beta(t+1)^\top (\psi(W(t+1)x_i) - \psi(W(t)x_i)) + \frac{1}{\sqrt{p}}(\beta(t+1) - (1 - \eta\lambda(t))\beta(t))^\top \psi(W(t)x_i) \\
&\quad + (1 - \eta\lambda(t)) \left( \frac{1}{\sqrt{p}}\beta(t)^\top \psi(W(t)x_i) - y_i \right) - \eta\lambda(t)y \\
&= (1 - \eta\lambda(t))e_i(t) - \frac{\eta}{p}\beta(t+1)^\top D_i(t) \sum_{j=1}^n D_j(t) b x_j^\top x_i e_j(t) - \frac{\eta}{p} \sum_{j=1}^n \psi(W(t)x_j)^\top \psi(W(t)x_i) e_j(t) - \eta\lambda(t)y \\
&\quad + v_i(t) \\
&= (1 - \eta\lambda(t))e_i(t) - \eta \sum_{j=1}^n (H_{ij}(t) + G_{ij}(t)) e_j(t) + v_i(t) - \eta\lambda(t)y
\end{aligned}$$

where

$$\begin{aligned}
G_{ij}(t) &= \frac{1}{p} \psi(W(t)x_j)^\top \psi(W(t)x_i) \\
H_{ij}(t) &= \frac{x_i^\top x_j}{p} \beta(t+1)^\top D_i(t) D_j(t) b
\end{aligned}$$

and  $v_i(t)$  is the residual term from a Taylor expansion

$$v_i(t) = \frac{1}{2\sqrt{p}} \sum_{r=1}^p \beta_r(t+1) |(w_r(t+1) - w_r(t))^\top x_i|^2 \psi''(\xi_{ri}(t))$$

with  $\xi_{ri}(t)$  between  $w_r(t)^\top x_i$  and  $w_r(t+1)^\top x_i$ . We can also rewrite the above iteration in vector form as

$$e(t+1) = (1 - \lambda(t))e(t) - \eta(G(t) + H(t))e(t) + v(t) - \eta\lambda(t)y. \quad (\text{A.15})$$

Now for  $t = t' - 1$ , we show that both  $G(t)$  and  $H(t)$  are close to their initialization. Using the argument in Lemma A.5, we can obtain following bounds

$$\|G(t) - G(0)\| \leq c_1 \frac{n^2 \sqrt{\log p}}{\gamma \sqrt{p}} (1 + \eta \tilde{S}_\lambda) \quad (\text{A.16})$$

$$\|H(t) - H(0)\| \leq c_2 \frac{n^2 \sqrt{\log p}}{\gamma \sqrt{p}} (1 + \eta \tilde{S}_\lambda) \quad (\text{A.17})$$

$$\|v(t)\| \leq c_3 \frac{\eta^2 n^2}{\sqrt{p}} \|e(t)\|. \quad (\text{A.18})$$

Combining Eqs. (A.15) to (A.18), we have

$$\begin{aligned}
\|e(t+1)\| &\leq \|(1 - \eta\lambda(t))I_n - \eta(G(t) + H(t))\| \|e(t)\| + \|v(t)\| \\
&\leq \left( \|(1 - \eta\lambda(t))I_n - \eta G(0)\| + \eta \|G(t) - G(0)\| + \eta \|H(0)\| \right. \\
&\quad \left. + \eta \|H(t) - H(0)\| \right) \|e(t)\| + \|v(t)\| \\
&\leq \left( 1 - \eta\lambda(t) - \frac{3\eta\gamma}{4} + (c_1 + c_2) \frac{\eta n^2 \sqrt{\log p}}{\gamma \sqrt{p}} (1 + \eta \tilde{S}_\lambda) + c_3 \frac{\eta^2 n \sqrt{n}}{\sqrt{p}} \right) \|e(t)\| \\
&\leq \left( 1 - \eta\lambda(t) - \frac{\eta\gamma}{4} \right) \|e(t)\|
\end{aligned}$$

where we use Lemma A.3,  $p = \Omega(\frac{n^4 \log p}{\gamma^4})$  and  $\tilde{S}_\lambda = O(\frac{\gamma^2 \sqrt{p}}{\eta n^2 \sqrt{\log p}})$ .  $\square$

*Proof of Theorem 4.2.* We prove the inequality (4.2) by induction. Suppose (4.2) holds for all  $t = 1, 2, \dots, t' - 1$ . Then by Lemma A.6 and Lemma A.7 we know (4.2) holds for  $t = t'$ , which completes the proof.  $\square$

## B Alignment on Two-Layer Linear Networks

Now we assume  $\psi(u) = u$ , so that  $f$  is a linear network. The loss function with regularization at time  $t$  is

$$\mathcal{L}(t, W, \beta) = \frac{1}{2} \left\| \frac{1}{\sqrt{p}} X W^\top \beta - y \right\|^2 + \frac{1}{2} \lambda(t) \|\beta\|^2. \quad (\text{B.1})$$

The regularized feedback alignment algorithm gives

$$\begin{aligned} W(t+1) &= W(t) - \eta \frac{1}{\sqrt{p}} b e(t)^\top X \\ \beta(t+1) &= (1 - \eta \lambda(t)) \beta(t) - \frac{\eta}{\sqrt{p}} W(t) X^\top e(t) \end{aligned} \quad (\text{B.2})$$

where  $e(t) = \frac{1}{\sqrt{p}} X W(t)^\top \beta(t) - y$  is the error vector at time  $t$ .

**Lemma B.1.** *Suppose the network is trained with the regularized feedback alignment algorithm (B.2). Then the prediction error  $e(t)$  satisfies the recurrence*

$$e(t+1) = \left[ (1 - \eta \lambda(t)) I_d - \frac{\eta}{p} X W(0)^\top W(0) X^\top - \eta (J_1(t) + J_2(t) + J_3(t)) \right] e(t) - \eta \lambda(t) y \quad (\text{B.3})$$

where

$$\begin{aligned} J_1(t) &= \frac{1}{p} b^\top \beta(0) \prod_{i=0}^t (1 - \eta \lambda(i)) X X^\top \\ J_2(t) &= -\frac{\eta}{p} \left( \bar{v}^\top X^\top \hat{s}(t) X X^\top + X X^\top s(t-1) \bar{v}^\top X^\top + X \bar{v} s(t-1)^\top X X^\top \right) \\ J_3(t) &= \frac{\eta^2}{p^2} \|b\|^2 \left( \hat{S}(t) X X^\top + X X^\top s(t-1) s(t-1)^\top X X^\top \right) \end{aligned}$$

and

$$\begin{aligned} \bar{v} &= \frac{1}{\sqrt{p}} W(0)^\top b \\ s(t) &= \sum_{i=0}^t e(i) \\ \hat{s}(t) &= \sum_{i=0}^t \prod_{i < k \leq t} (1 - \eta \lambda(k)) e(i) \\ \hat{S}(t) &= \sum_{i=0}^t \prod_{i < k \leq t} (1 - \eta \lambda(k)) e(i)^\top X X^\top \sum_{j=0}^{i-1} e(j). \end{aligned}$$

*Proof.* We first write  $W(t)$  in terms of  $W(0)$  and  $e(i)$ ,  $i \in [t]$ , so that

$$W(t) = W(0) - \frac{\eta}{\sqrt{p}} b \sum_{i=0}^{t-1} e(i)^\top X = W(0) - \frac{\eta}{\sqrt{p}} b s(t-1)^\top X. \quad (\text{B.4})$$



Similarly, for  $\beta(t)$  we have

$$\begin{aligned}
\beta(t) &= \prod_{i=0}^{t-1} (1 - \eta\lambda(i))\beta(0) - \frac{\eta}{\sqrt{p}} \sum_{i=0}^{t-1} \prod_{i < k < t} (1 - \eta\lambda(k)) W(i) X^\top e(i) \\
&= \prod_{i=0}^{t-1} (1 - \eta\lambda(i))\beta(0) - \frac{\eta}{\sqrt{p}} \sum_{i=0}^{t-1} \prod_{i < k < t} (1 - \eta\lambda(k)) \left( W(0) - \frac{\eta}{\sqrt{p}} b \sum_{j=0}^{i-1} e(j)^\top X \right) X^\top e(i) \\
&= \prod_{i=0}^{t-1} (1 - \eta\lambda(i))\beta(0) - \frac{\eta}{\sqrt{p}} \sum_{i=0}^{t-1} \prod_{i < k < t} (1 - \eta\lambda(k)) W(0) X^\top e(i) \\
&\quad + \frac{\eta^2}{p} b \sum_{i=0}^{t-1} \prod_{i < k < t} (1 - \eta\lambda(k)) e(i)^\top X X^\top \sum_{j=0}^{i-1} e(j) \\
&= \prod_{i=0}^{t-1} (1 - \eta\lambda(i))\beta(0) - \frac{\eta}{\sqrt{p}} W(0) X^\top \hat{s}(t-1) + \frac{\eta^2}{p} b \hat{S}(t-1).
\end{aligned} \tag{B.5}$$

We now study how the error  $e(t)$  changes after a single update step, writing

$$\begin{aligned}
e(t+1) &= \frac{1}{\sqrt{p}} X W(t+1)^\top \beta(t+1) - y \\
&= \frac{1}{\sqrt{p}} X (W(t+1) - W(t)^\top \beta(t+1)) + \frac{1}{\sqrt{p}} X W(t)^\top (\beta(t+1) - (1 - \eta\lambda(t))\beta(t)) \\
&\quad + (1 - \eta\lambda(t)) \left( \frac{1}{\sqrt{p}} X W(t)^\top \beta(t) - y \right) - \eta\lambda(t)y \\
&= (1 - \eta\lambda(t))e(t) - \frac{\eta}{p} b^\top \beta(t+1) X X^\top e(t) - \frac{\eta}{p} X W(t)^\top W(t) X^\top e(t) - \eta\lambda(t)y
\end{aligned}$$

By plugging (B.4) and (B.5) into above equation, we have

$$\begin{aligned}
e(t+1) &= (1 - \eta\lambda(t))e(t) \\
&\quad - \frac{\eta}{p} b^\top \left[ \prod_{i=0}^t (1 - \eta\lambda(i))\beta(0) - \frac{\eta}{\sqrt{p}} W(0) X^\top \hat{s}(t) + \frac{\eta^2}{p} b \hat{S}(t) \right] X X^\top e(t) \\
&\quad - \frac{\eta}{p} X \left[ W(0) - \frac{\eta}{\sqrt{p}} b s(t-1)^\top X \right]^\top \left[ W(0) - \frac{\eta}{\sqrt{p}} b s(t-1)^\top X \right] X^\top e(t) \\
&\quad - \eta\lambda(t)y
\end{aligned}$$

After expanding the brackets and rearranging the items, we can obtain (B.3).  $\square$

**Lemma B.2.** Given  $\delta \in (0, 1)$  and  $\epsilon > 0$ , if  $p = \Omega(\frac{1}{\epsilon} \log \frac{d}{\delta} + \frac{d}{\epsilon} \log \frac{1}{\epsilon})$ , the following inequalities hold with probability at least  $1 - \delta$

$$\frac{|b^\top \beta(0)|}{\sqrt{p}} \leq c \sqrt{\log \frac{1}{\delta}} \tag{B.6}$$

$$\frac{\|b^\top W(0)\|}{\sqrt{p}} \leq c \sqrt{d \log \frac{d}{\delta}} \tag{B.7}$$

$$\left| \frac{\|b\|^2}{p} - 1 \right| \leq \frac{c}{\sqrt{p}} \sqrt{\log \frac{1}{\delta}} \tag{B.8}$$

$$\left\| \frac{1}{p} W(0)^\top W(0) - I_d \right\| \leq \epsilon \tag{B.9}$$

where  $c$  is a constant.

*Proof.* (B.6) is derived from Lemma C.4. (B.7) is by (B.6) and a union bound argument. (B.8) is by Lemma C.3. (B.9) is by Corollary C.2  $\square$

*Proof of Theorem 4.3.* We show (4.3) by induction. Assume (4.3) holds for all  $t = 0, 1, \dots, t'$ , we will show it hold for  $t = t' + 1$ . For any  $k \leq t'$ , we apply (4.3) repeatedly on the right hand side of itself to get

$$\|e(k)\| \leq \prod_{i=0}^{k-1} \left(1 - \frac{\eta\gamma}{2} - \eta\lambda(i)\right) \|e(0)\| + \sum_{i=0}^{k-1} \eta\lambda(i) \prod_{i < j < k} \left(1 - \frac{\eta\gamma}{2} - \eta\lambda(j)\right) \|y\|$$

For  $t \leq t'$ , we take the sum over  $k = 0, \dots, t$  on both sides of above inequality

$$\begin{aligned} \sum_{k=0}^t \|e(k)\| &\leq \sum_{k=0}^t \prod_{i=0}^{k-1} \left(1 - \frac{\eta\gamma}{2} - \eta\lambda(i)\right) \|e(0)\| + \sum_{k=0}^t \sum_{i=0}^{k-1} \eta\lambda(i) \prod_{i < j < k} \left(1 - \frac{\eta\gamma}{2} - \eta\lambda(j)\right) \|y\| \\ &\leq \sum_{k=0}^t \left(1 - \frac{\eta\gamma}{2}\right)^{k-1} \|e(0)\| + \sum_{k=0}^t \sum_{i=0}^{k-1} \eta\lambda(i) \left(1 - \frac{\eta\gamma}{2}\right)^{k-i-1} \|y\| \\ &\leq \sum_{k=0}^t \left(1 - \frac{\eta\gamma}{2}\right)^{k-1} \|e(0)\| + \eta \|y\| \sum_{k=0}^{t-1} \lambda(i) \sum_{k=i+1}^T \left(1 - \frac{\eta\gamma}{2}\right)^{k-i-1} \\ &\leq \frac{2}{\eta\gamma} \|e(0)\| + \frac{2}{\gamma} S_\lambda \|y\| \\ &\leq \frac{c\sqrt{n}}{\gamma} \left(\frac{1}{\eta} + S_\lambda\right) \end{aligned}$$

where we use  $\|e(0)\| = O(\sqrt{n})$  and  $\|y\| = O(\sqrt{n})$ . With this bound and the inequalities from Lemma B.2, we can bound the norms of  $J_1(t)$ ,  $J_2(t)$  and  $J_3(t)$  from Lemma B.1. It follows that

$$\|J_1(t)\| \leq \frac{1}{p} \|b^\top \beta(0)\| \|XX^\top\| \leq c \frac{M\sqrt{\log \delta^{-1}}}{\sqrt{p}} \leq \frac{\gamma}{16}, \quad (\text{B.10})$$

$$\|J_2(t)\| \leq \frac{\eta}{p} \|X\| \|XX^\top\| \|\bar{v}\| (2\|s(t-1)\| + \|\hat{s}(t)\|) \leq c \frac{\eta}{p} M^{3/2} \sqrt{d \log \frac{d}{\delta}} \frac{\sqrt{n}}{\gamma} \left(\frac{1}{\eta} + S_\lambda\right) \leq \frac{\gamma}{16} \quad (\text{B.11})$$

and

$$\|J_3(t)\| \leq \frac{\eta^2}{p^2} \|b\|^2 (\|XX^\top\| \|\hat{S}(t)\| + \|XX^\top\|^2 \|s(t-1)\|) \leq c \frac{\eta^2}{p} M^2 \frac{n}{\gamma^2} \left(\frac{1}{\eta} + S_\lambda\right)^2 \leq \frac{\gamma}{16} \quad (\text{B.12})$$

hold for all  $t \leq t'$  if  $p = \Omega\left(\frac{Md \log(d/\delta)}{\gamma}\right)$  and  $S_\lambda = O\left(\frac{\gamma\sqrt{\gamma p}}{\eta\sqrt{n}M}\right)$ . Furthermore, since  $\|\frac{1}{p}W(0)W(0)^\top - I_d\| \leq \epsilon_0$  with high probability when  $p = \Omega(d)$ , we have

$$\begin{aligned} \left\| \frac{1}{p} XW(0)^\top W(0)X^\top - \gamma I_d \right\| &\leq \left\| \frac{1}{p} XW(0)^\top W(0)X^\top - XX^\top \right\| + \|XX^\top - \gamma I_d\| \\ &\leq (1 + \epsilon)\epsilon_0\gamma + \epsilon\gamma \leq \frac{\gamma}{16} \end{aligned} \quad (\text{B.13})$$

Therefore, combining (B.10), (B.11), (B.12) and (B.3), we have

$$\begin{aligned} \|e(t'+1)\| &\leq \left(1 - \eta\lambda(t') - \eta\gamma\right) \|e(t')\| + \eta \left\| \frac{\eta}{p} XW(0)^\top W(0)X^\top - \gamma I_d \right\| \|e(t')\| \\ &\quad + \eta (\|J_1(t')\| + \|J_2(t')\| + \|J_3(t')\|) \|e(t')\| + \eta\lambda(t') \|y\| \\ &\leq \left(1 - \eta\lambda(t') - \eta\gamma\right) \|e(t')\| + \frac{1}{16} \eta\gamma \|e(t')\| + \frac{3}{16} \eta\gamma \|e(t')\| + \eta\lambda(t') \|y\| \\ &\leq \left(1 - \eta\lambda(t') - \frac{\eta\gamma}{2}\right) \|e(t')\| + \eta\lambda(t') \|y\| \end{aligned}$$

which completes the proof.  $\square$

*Proof of Proposition 4.5.* By Corollary C.2, if  $d = \Omega\left(\frac{1}{\epsilon} \log \frac{n}{\delta} + \frac{n}{\epsilon} \log \frac{1}{\epsilon}\right)$ , we have

$$\|XX^\top - I_n\| \leq \epsilon$$

It follows that  $\lambda_{\min}(XX^\top) \geq 1 - \epsilon$  and  $\lambda_{\max}(XX^\top) \leq 1 + \epsilon \leq (1 + 4\epsilon)(1 - \epsilon)$  for  $\epsilon < 1/2$ .  $\square$

**Lemma B.3.** Recall from Lemma B.1 that

$$\beta(t) = \prod_{i=0}^{t-1} (1 - \eta\lambda(i))\beta(0) - \frac{\eta}{\sqrt{p}}W(0)X^\top \hat{s}(t-1) + \frac{\eta^2}{p}b\hat{S}(t-1)$$

with  $\hat{s}(t) = \sum_{i=0}^t \prod_{i < k \leq t} (1 - \eta\lambda(k))e(i)$  and  $\hat{S}(t) = \sum_{i=0}^t \prod_{i < k \leq t} (1 - \eta\lambda(k))e(i)^\top XX^\top \sum_{j=0}^{i-1} e(j)$ . Under the conditions of Theorem 4.6, if  $t > C_1 \frac{\log(p/\eta)}{\eta\lambda}$  and  $\hat{S}(t) \geq \max(C_2 \frac{\sqrt{p\gamma}}{\eta} \|\hat{s}(t)\|, 1)$  for some positive constants  $C_1$  and  $C_2$ , then  $\cos \angle(b, \beta(t)) \geq c$  for some constant  $c = c_\delta$ .

*Proof.* We compute the cosine of the angle between  $\beta(t)$  and  $b$ . With probability  $1 - \delta$ ,

$$\begin{aligned} \cos \angle(b, \beta(t)) &= \frac{b^\top \beta(t)}{\|b\| \|\beta(t)\|} = \frac{\frac{b}{\|b\|}^\top \beta(t)}{\|\beta(t)\|} \\ &\geq \frac{\frac{\eta^2}{p} \|b\| \hat{S}(t-1) - (1 - \eta\lambda)^t \|\beta(0)\| - \frac{\eta}{\sqrt{p}} \|\frac{b}{\|b\|}^\top W(0)\| \|X\| \|\hat{s}(t-1)\|}{\frac{\eta^2}{p} \|b\| \hat{S}(t-1) + (1 - \eta\lambda)^t \|\beta(0)\| + \frac{\eta}{\sqrt{p}} \|W(0)\| \|X\| \|\hat{s}(t-1)\|} \\ &\geq \frac{c'_1 \frac{\eta^2}{\sqrt{p}} \hat{S}(t-1) - c'_2 \sqrt{p}(1 - \eta\lambda)^t - c'_3 \eta \sqrt{\frac{d\gamma}{p}} \|\hat{s}(t-1)\|}{c'_1 \frac{\eta^2}{\sqrt{p}} \hat{S}(t-1) + c'_2 \sqrt{p}(1 - \eta\lambda)^t + c'_4 \eta \sqrt{\gamma} \|\hat{s}(t-1)\|} \end{aligned}$$

where we use (B.8), (B.9) and the tail bound for standard Gaussian vectors, and  $c'_i$  are constants that only depend on  $\delta$ . Notice that if  $t = \Omega(\frac{\log(p/\eta)}{\eta\lambda})$ , we have  $c'_2 \sqrt{p}(1 - \eta\lambda)^t = O(\frac{\eta^2}{\sqrt{p}})$ . It follows that  $\cos \angle(b, \beta(t)) \geq c$  if  $\hat{S}(t-1) = \Omega(\frac{\sqrt{p\gamma}}{\eta} \|\hat{s}(t-1)\| + 1)$ .  $\square$

**Lemma B.4.** Consider the orthogonal decomposition  $e(t) = a(t)\bar{y} + \xi(t)$ , where  $\bar{y} = -y/\|y\|$  and  $\xi(t) \perp y$ . Under the conditions of Theorem 4.6, there exists a constant  $C_\tau > 0$  such that for any  $t \in [\tau, T]$  with  $\tau = \frac{C_\tau}{\eta\lambda}$ , we have

$$a(t) \geq \frac{\lambda - \gamma}{\lambda + \gamma} \|y\| \quad (\text{B.14})$$

and

$$\|\xi(t)\| \leq \frac{\gamma}{\lambda + \gamma} \|y\|. \quad (\text{B.15})$$

*Proof.* By Theorem 4.3, we have for all  $t \leq T$ ,  $\|e(t)\| \leq (1 - \eta\lambda - \eta\gamma/2)\|e(t)\| + \eta\lambda\|y\|$ . By rearranging the terms, we have

$$\|e(t+1)\| - \frac{\lambda}{\lambda - \gamma/2} \|y\| \leq (1 - \eta\lambda - \frac{\eta\gamma}{2}) \left( \|e(t)\| - \frac{\lambda}{\lambda - \gamma/2} \|y\| \right)$$

or

$$\|e(t)\| - \frac{\lambda}{\lambda - \gamma/2} \|y\| \leq (1 - \eta\lambda - \frac{\eta\gamma}{2})^t \left( \|e_0\| - \frac{\lambda}{\lambda - \gamma/2} \|y\| \right) \leq (1 - \eta\lambda)^t (\|e_0\| + \|y\|).$$

Notice that  $\|y\|$  and  $\|e(0)\|$  are of the same order, so when  $t \in [\tau_1, T]$  with  $\tau_1 = \frac{c_1}{\eta\lambda}$  and some constant  $c_1$ , we have

$$\|e(t)\| \leq \frac{\lambda + \gamma/2}{\lambda - \gamma/2} \|y\|. \quad (\text{B.16})$$

In order to get a lower bound for  $a(t)$ , we multiply  $\bar{y}^\top$  on both sides of (B.3). It follows that for  $t \in [\tau_1, T]$

$$\begin{aligned} a(t+1) &\geq \bar{y}^\top \left( (1 - \eta\lambda - \eta\gamma)e(t) - \eta \frac{1}{p} XW(0)^\top W(0)X^\top - \gamma I_d \right) \|e(t)\| \\ &\quad - \eta (\|J_1(t)\| + \|J_2(t)\| + \|J_3(t)\|) \|e(t)\| + \eta\lambda\|y\| \\ &\geq (1 - \eta\lambda - \eta\gamma)a(t) - \frac{1}{4}\eta\gamma\|e(t)\| + \eta\lambda\|y\| \\ &\geq (1 - \eta\lambda - \eta\gamma)a(t) + \frac{1}{2}\eta\gamma\|y\|. \end{aligned}$$

In the second inequality, we use the bounds (B.10), (B.11), (B.12) and (B.13). The last inequality is by (B.16) and  $\lambda \geq 3\gamma$ . Following a similar derivation, we have

$$a(t) - \frac{\lambda - \gamma/2}{\lambda + \gamma} \|y\| \geq (1 - \eta\lambda - \eta\gamma)^{t-\tau_1} \left( a(\tau_1) - \frac{\lambda - \gamma/2}{\lambda + \gamma} \|y\| \right) \geq -(1 - \eta\lambda)^{t-\tau_1} (\|e(\tau_1)\| + \|y\|).$$

The bound (B.14) holds when  $t \in [\tau_1 + \tau_2, T]$  with  $\tau_2 = \frac{c_2}{\eta\lambda}$  and some constant  $c_2$ . Then we multiply  $\frac{\xi(t+1)^\top}{\|\xi(t+1)\|}$  on both sides of (B.3). This establishes that for  $t \in [\tau_1, T]$

$$\begin{aligned} \|\xi(t+1)\| &\leq \frac{\xi(t+1)^\top}{\|\xi(t+1)\|} \left( (1 - \eta\lambda - \eta\gamma)e(t) + \eta \left\| \frac{1}{p} XW(0)^\top W(0)X^\top - \gamma I_d \right\| \|e(t)\| \right) \\ &\quad + \eta (\|J_1(t)\| + \|J_2(t)\| + \|J_3(t)\|) \|e(t)\| + \eta\lambda \|y\| \\ &\leq (1 - \eta\lambda - \eta\gamma) \|\xi(t)\| + \frac{\eta\gamma}{4} \|e(t)\| \\ &\leq (1 - \eta\lambda - \eta\gamma) \|\xi(t)\| + \frac{\eta\gamma}{2} \eta\gamma \|y\|. \end{aligned}$$

The first inequality is by  $\xi(t+1)^\top y = 0$  and in the second inequality we use  $\xi(t+1)^\top e(t) = \xi(t+1)^\top \xi(t) \leq \|\xi(t+1)\| \|\xi(t)\|$ . It follows that

$$\|\xi(t)\| - \frac{\gamma/2}{\lambda + \gamma} \|y\| \leq (1 - \eta\lambda - \eta\gamma)^{t-\tau_1} \left( \|\xi(0)\| - \frac{\gamma/2}{\lambda + \gamma} \|y\| \right) \leq (1 - \eta\lambda)^{t-\tau_1} (\|e(\tau_1)\| + \|y\|).$$

The bound (B.15) holds when  $t \in [\tau_1 + \tau_3, T]$  with  $\tau_3 = \frac{c_3}{\eta\lambda}$  for a constant  $c_3$ . Finally, the bounds (B.14) and (B.15) hold when  $t \in [\tau, T]$  with  $\tau = \tau_1 + \max(\tau_2, \tau_3)$ .  $\square$

**Lemma B.5.** *Under the conditions of Theorem 4.6, suppose  $T = \lfloor \frac{S\lambda}{\lambda} \rfloor = C_T \frac{\sqrt{p}}{\eta\sqrt{n\gamma}}$ . Then we have  $\hat{S}(T) \geq \tilde{c} \frac{\sqrt{p\gamma}}{\eta} \|\hat{s}(T)\|$ , where  $C_T$  and  $\tilde{c}$  are positive constants.*

*Proof.* Notice that

$$e(i)^\top X X^\top e(j) \geq \gamma e(i)^\top e(j) - \|e(i)\| \|e(j)\| \|X X^\top - \gamma I\| \geq \gamma e(i)^\top e(j) - \epsilon\gamma \|e(i)\| \|e(j)\|.$$

For  $i \in [T/2, T]$  and  $\tau$  defined in Lemma B.4, we have

$$\begin{aligned} e(i)^\top X X^\top \sum_{j < i} e(j) &= e(i)^\top X X^\top \sum_{\tau \leq j < i} e(j) + e(i)^\top X X^\top \sum_{j < \tau} e(j) \\ &\geq \sum_{\tau \leq j < i} \left( \gamma e(i)^\top e(j) - \epsilon\gamma \|e(i)\| \|e(j)\| \right) - 2\gamma \sum_{j < \tau} \|e(i)\| \|e(j)\| \\ &\geq \sum_{\tau \leq j < i} \gamma \left( a(i)a(j) - \|\xi(i)\| \|\xi(j)\| - \epsilon \|e(i)\| \|e(j)\| \right) - 2c\tau\gamma \|y\|^2 \\ &\geq (i - \tau)\gamma \left[ \left( \frac{\lambda - \gamma}{\lambda + \gamma} \right)^2 \|y\|^2 - \left( \frac{\gamma}{\lambda + \gamma} \right)^2 \|y\|^2 - \epsilon \left( \frac{\lambda + \gamma/2}{\lambda - \gamma/2} \right)^2 \|y\|^2 - \frac{2c\tau}{i - \tau} \|y\|^2 \right] \\ &\geq \frac{T}{8} \gamma \|y\|^2 = \frac{C_T}{8} \frac{\sqrt{p}}{\eta\sqrt{n\gamma}} \gamma \|y\|^2 \\ &\geq c \frac{\sqrt{p\gamma}}{\eta} \|y\|. \end{aligned} \tag{B.17}$$

The second inequality is the orthogonal decomposition of  $e(i)$  and  $\|e(i)\| \leq c\|y\|$  given by (4.3). The third inequality is by (B.14), (B.15) and (B.16) from Lemma B.4. The fourth inequality is by  $\lambda = \Omega(\gamma)$ ,  $i - \tau \geq T/4$  and the fact that  $\tau/(i - \tau)$  is small ( $p = \Omega(n)$ ). The last inequality is by

$\|y\| = \Theta(\sqrt{n})$ . Therefore,

$$\begin{aligned}
\hat{S}(T) &= \sum_{i=0}^T (1 - \eta\lambda)^{T-i} e(i)^\top X X^\top \sum_{j<i} e(j) \\
&= \sum_{i=T/2}^T (1 - \eta\lambda)^{T-i} e(i)^\top X X^\top \sum_{j<i} e(j) + (1 - \eta\lambda)^{T/2} \sum_{i=0}^{T/2} (1 - \eta\lambda)^{T/2-i} e(i)^\top X X^\top \sum_{j<i} e(j) \\
&\geq \sum_{i=T/2}^T (1 - \eta\lambda)^{T-i} c \frac{\sqrt{p\gamma}}{\eta} \|y\| + (1 - \eta\lambda)^{T/2} \sum_{i=0}^{T/2} (1 - \eta\lambda)^{T/2-i} c' T \gamma \|y\|^2 \\
&\geq \frac{c}{2} \frac{\sqrt{p\gamma}}{\eta} \frac{\|y\|}{\eta\lambda} - (1 - \eta\lambda)^{T/2} \frac{c' T \gamma \|y\|^2}{\eta\lambda} \\
&\geq \frac{c}{4} \frac{\sqrt{p\gamma}}{\eta} \frac{\|y\|}{\eta\lambda}
\end{aligned}$$

where the last inequality is by  $(1 - \eta\lambda)^{T/2} \ll 1$  when  $p = \Omega(n)$ . On the other hand,

$$\|\hat{s}(T)\| \leq \sum_{i=0}^T (1 - \eta\lambda)^{T-i} \|e(i)\| \leq \frac{c}{\eta\lambda} \|y\|.$$

Combining the above inequalities gives the proof.  $\square$

*Proof of Theorem 4.6.* First, notice that  $\lambda(t) = 0$  when  $t > T$ . By Theorem 4.3 we have that the prediction error converges to zero exponentially fast, or  $\|e(t+1)\| \leq (1 - \eta\gamma/2)\|e(t)\|$ . It follows that  $\hat{S}(t) \rightarrow \hat{S}(\infty)$  and  $\hat{s}(t) \rightarrow \hat{s}(\infty)$  as  $t \rightarrow \infty$ . By Lemma B.3, we know it suffices to show  $\hat{S}(\infty) \geq C \frac{\sqrt{p\gamma}}{\eta} \|\hat{s}(\infty)\|$  with some constant  $C$ . Since

$$\hat{S}(\infty) = \sum_{i=0}^{\infty} (1 - \eta\lambda)^{(T-i)+} e(i)^\top X X^\top \sum_{j<i} e(j) = \hat{S}(T) + \sum_{i>T} e(i)^\top X X^\top \sum_{j<i} e(j)$$

and

$$\hat{s}(\infty) = \sum_{i=0}^{\infty} (1 - \eta\lambda)^{(T-i)+} e(i) = \hat{s}(T) + \sum_{i>T} e(i),$$

by Lemma B.5, it suffices to show

$$\sum_{i>T} e(i)^\top X X^\top \sum_{j<i} e(j) \geq C \frac{\sqrt{p\gamma}}{\eta} \sum_{i>T} \|e(i)\|. \quad (\text{B.18})$$

We write  $g = X X^\top \sum_{j<T} e(j)$ . Then we have

$$\begin{aligned}
\|g\| &\geq \lambda_{\min}(X X^\top) \left[ \left\| \sum_{\tau \geq j < T} e(j) \right\| - \sum_{j < \tau} \|e(j)\| \right] \\
&\geq \lambda_{\min}(X X^\top) \left[ \sum_{\tau \geq j < T} a(j) - \sum_{j < \tau} \|e(j)\| \right] \\
&\geq \gamma \left[ (T - \tau) \left( \frac{\lambda - \gamma}{\lambda + \gamma} \right) \|y\| - \tau c \|y\| \right]
\end{aligned} \quad (\text{B.19})$$

and

$$\begin{aligned}
\|g\| &\leq \|X X^\top\| \left( \sum_{j < \tau} \|e(j)\| + \sum_{\tau \geq j < T} \|e(j)\| \right) \\
&\leq (1 + \epsilon) \gamma \left[ \tau c \|y\| + (T - \tau) \left( \frac{\lambda + \gamma/2}{\lambda - \gamma/2} \right) \|y\| \right]
\end{aligned} \quad (\text{B.20})$$

where we use the bounds (B.14) and (B.16) from Lemma B.4. We further denote  $\alpha(t) = \bar{g}^\top e(t)$  where  $\bar{g} = g/\|g\|$ . Following the same calculation in (B.17), we have

$$\begin{aligned} g^\top e(T) &= e(T)^\top X X^\top \sum_{j < T} e(j) \\ &\geq (T - \tau)\gamma \left[ \left( \frac{\lambda - \gamma}{\lambda + \gamma} \right)^2 \|y\|^2 - \left( \frac{\gamma}{\lambda + \gamma} \right)^2 \|y\|^2 - \epsilon \left( \frac{\lambda + \gamma/2}{\lambda - \gamma/2} \right)^2 \|y\|^2 - \frac{2c\tau}{T - \tau} \|y\|^2 \right]. \end{aligned}$$

Then

$$\begin{aligned} \frac{\alpha(T)}{\|e(T)\|} &\geq \frac{g^\top e(T)}{\|g\| \|e(T)\|} \\ &\geq \frac{(T - \tau)\gamma \left[ \left( \frac{\lambda - \gamma}{\lambda + \gamma} \right)^2 \|y\|^2 - \left( \frac{\gamma}{\lambda + \gamma} \right)^2 \|y\|^2 - \epsilon \left( \frac{\lambda + \gamma/2}{\lambda - \gamma/2} \right)^2 \|y\|^2 - \frac{2c\tau}{T - \tau} \|y\|^2 \right]}{(1 + \epsilon)\gamma \left[ \tau c \|y\| + (T - \tau) \left( \frac{\lambda + \gamma/2}{\lambda - \gamma/2} \right) \|y\| \right] \times \left( \frac{\lambda + \gamma/2}{\lambda - \gamma/2} \right) \|y\|} \\ &\geq \frac{\left[ \left( \frac{\lambda - \gamma}{\lambda + \gamma} \right)^2 - \left( \frac{\gamma}{\lambda + \gamma} \right)^2 - \epsilon \left( \frac{\lambda + \gamma/2}{\lambda - \gamma/2} \right)^2 - \frac{2c\tau}{T - \tau} \right]}{(1 + \epsilon) \left[ \frac{\tau c}{T - \tau} + \left( \frac{\lambda + \gamma/2}{\lambda - \gamma/2} \right) \right] \times \left( \frac{\lambda + \gamma/2}{\lambda - \gamma/2} \right)}. \end{aligned}$$

Notice that  $T/\tau = \Omega(\sqrt{p/n})$ , so that when  $p/n$ ,  $\lambda/\gamma$  are large and  $\epsilon$  is small, we have

$$\alpha(T) \geq \frac{3}{4} \|e(T)\|. \quad (\text{B.21})$$

In order to obtain the lower bound on  $\alpha(t)$  for all  $t \geq T$ , we multiply  $\bar{g}^\top$  on both sides of (B.3). Notice  $\lambda(t) = 0$  and apply the bounds (B.10), (B.11), (B.12) and (B.13). We have that

$$\begin{aligned} \alpha(t + 1) &\geq (1 - \eta\gamma)\bar{g}^\top e(t) - \eta \left\| \frac{1}{p} X W(0)^\top W(0) X^\top - \gamma I_d \right\| \|e(t)\| \\ &\quad - \eta (\|J_1(t)\| + \|J_2(t)\| + \|J_3(t)\|) \|e(t)\| \\ &\geq (1 - \eta\gamma)\alpha(t) - \frac{\eta\gamma}{4} \|e(t)\| \end{aligned}$$

or for  $t \geq T$ ,

$$\alpha(t) \geq (1 - \eta\gamma)^{t-T} \alpha(T) - \frac{\eta\gamma}{4} \sum_{i=T}^{t-1} (1 - \eta\gamma)^{t-i} \|e(i)\|. \quad (\text{B.22})$$

Taking the sum over  $t > T$ , we have

$$\begin{aligned} \sum_{t > T} \alpha(t) &\geq \sum_{t > T} (1 - \eta\gamma)^{t-T} \alpha(T) - \frac{\eta\gamma}{4} \sum_{t > T} \sum_{i=T}^{t-1} (1 - \eta\gamma)^{t-i} \|e(i)\| \\ &\geq \frac{1 - \eta\gamma}{\eta\gamma} \alpha(T) - \frac{\eta\gamma}{4} \sum_{i > T} \|e(i)\| \sum_{t > i} (1 - \eta\gamma)^{t-i} \\ &\geq \frac{1 - \eta\gamma}{\eta\gamma} \left( \alpha(T) - \frac{\eta\gamma}{4} \sum_{i > T} \|e(i)\| \right) \\ &\geq \frac{1 - \eta\gamma}{\eta\gamma} \left( \alpha(T) - \frac{1}{2} \|e(T)\| \right) \\ &\geq \frac{1 - \eta\gamma}{4\eta\gamma} \|e(T)\|. \end{aligned} \quad (\text{B.23})$$

The second inequality follows from switching the order of sums. The fourth inequality is by exponential convergence after  $T$  steps. The last inequality is by (B.21). With the above inequalities, we

are ready to bound the left hand side of (B.18), obtaining

$$\begin{aligned}
\sum_{i>T} e(i)^\top X X^\top \sum_{j<i} e(j) &= \sum_{i>T} e(i)^\top X X^\top \sum_{j<T} e(j) + \sum_{i>T} e(i)^\top X X^\top \sum_{j\geq T} e(j) \\
&\geq \sum_{i>T} \alpha(i) \|g\| - 2\gamma \left( \sum_{i\geq T} \|e(i)\| \right)^2 \\
&\geq \frac{1-\eta\gamma}{4\eta\gamma} \|e(T)\| \gamma \left[ (T-\tau) \left( \frac{\lambda-\gamma}{\lambda+\gamma} \right) \|y\| - \tau c \|y\| \right] - 2\gamma \frac{4}{\eta^2 \gamma^2} \|e(T)\|^2 \\
&\geq \frac{1-\eta\gamma}{4\eta\gamma} \|e(T)\| \gamma \left[ (T-\tau) \left( \frac{\lambda-\gamma}{\lambda+\gamma} \right) \|y\| - \tau c \|y\| - \frac{64}{\eta\gamma(1-\eta\gamma)} \|y\| \right] \\
&\geq \frac{1-\eta\gamma}{4\eta\gamma} \|e(T)\| \gamma \frac{T}{2} \|y\| = \frac{1-\eta\gamma}{4\eta\gamma} \|e(T)\| \gamma \frac{C_T}{2} \frac{\sqrt{p}}{\eta\sqrt{n}\gamma} \|y\| \\
&\geq C \frac{1-\eta\gamma}{4\eta\gamma} \frac{\sqrt{p\gamma}}{\eta} \|e(T)\|.
\end{aligned} \tag{B.24}$$

The second inequality is by (B.23) and (B.19). The third inequality is by  $\|e(T)\| \leq 2\|y\|$ . The last inequality is by  $\|y\| = \Theta(\sqrt{n})$ . On the other hand,

$$\sum_{i>T} \|e(i)\| \leq \sum_{i>T} (1-\eta\gamma/2)^{i-T} \|e(T)\| = \frac{1-\eta\gamma/2}{\eta\gamma/2} \|e(T)\| \tag{B.25}$$

Combining (B.24) and (B.25) implies (B.18), as desired.  $\square$

## C Technical Lemmas

In this section, we list technical lemmas that are used in our proofs, with references. The first is a variant of the Restricted Isometry Property that bounds the spectral norm of a random Gaussian matrix around 1 with high probability.

**Lemma C.1** (Hand & Voroninski, 2018). *Let  $A \in \mathbb{R}^{m \times n}$  has i.i.d.  $\mathcal{N}(0, 1/m)$  entries. Fix  $0 < \varepsilon < 1$ ,  $k < m$ , and a subspace  $T \subseteq \mathbb{R}^n$  of dimension  $k$ , then there exists universal constants  $c_1$  and  $\gamma_1$ , such that with probability at least  $1 - (c_1/\varepsilon)^k e^{-\gamma_1 \varepsilon^m}$ ,*

$$(1-\varepsilon) \|v\|_2^2 \leq \|Av\|_2^2 \leq (1+\varepsilon) \|v\|_2^2, \quad \forall v \in T.$$

Let us take  $k = n$  in Lemma C.1 to get the following corollary.

**Corollary C.2.** *Let  $A \in \mathbb{R}^{m \times n}$  has i.i.d.  $\mathcal{N}(0, 1/m)$  entries. For any  $0 < \varepsilon < 1$ , there exists universal constants  $c_2$  and  $\gamma_2$ , such that with probability at least  $1 - (c_2/\varepsilon)^d e^{-\gamma_2 \varepsilon^m}$ ,*

$$\|A^\top A - I_m\| \leq \varepsilon$$

Then following lemma gives tail bounds for  $\chi^2$  random variables.

**Lemma C.3** (Laurent & Massart, 2000). *Suppose  $X \sim \chi_p^2$ , then for all  $t \geq 0$  it holds*

$$\mathbb{P}\{X - p \geq 2\sqrt{pt} + 2t\} \leq e^{-t}$$

and

$$\mathbb{P}\{X - p \leq -2\sqrt{pt}\} \leq e^{-t}.$$

For two independent random Gaussian vectors, their inner product can be controlled with the following tail bound.

**Lemma C.4** (Gao & Lafferty, 2020). *Let  $X, Y \in \mathbb{R}^p$  be independent random Gaussian vectors where  $X_r \sim \mathcal{N}(0, 1)$  and  $Y_r \sim \mathcal{N}(0, 1)$  for all  $r \in [p]$ , then it holds*

$$\mathbb{P}\{|X^\top Y| \geq \sqrt{2pt} + 2t\} \leq 2e^{-t}.$$

## References

- Gao, C. & Lafferty, J. (2020). Model repair: Robust recovery of over-parameterized statistical models. *arXiv preprint arXiv:2005.09912*.
- Hand, P. & Voroninski, V. (2018). Global guarantees for enforcing deep generative priors by empirical risk. In *Conference On Learning Theory* (pp. 970–978).: PMLR.
- Laurent, B. & Massart, P. (2000). Adaptive estimation of a quadratic functional by model selection. *Annals of Statistics*, (pp. 1302–1338).
